# Supplementary material for: Manganese corrole catalyzed selective oxidation of styrene to benzaldehyde: sodium nitrite functions as an oxidant and cocatalyst
Source: Royal Society of Chemistry journal article supplement (doi:10.1039/d2ob01428a), 2022-01-01
Supplement: d2ob01428a1.pdf [file d2ob01428a1.pdf]

## Supporting Information

for

# Manganese Corrole Catalyzed Selective Oxidation of Styrene to Benzaldehyde: Sodium Nitrite Functions as Oxidant and Cocatalyst

Bei Wan,<sup>a</sup> Fan Cheng,<sup>a</sup> Hua-Hua Wang,<sup>a</sup> Atif Ali,<sup>a</sup> Yan-Mei Sun,<sup>a</sup> Hai-Yang Liu <sup>\*,a</sup> and Chi-Kwong Chang <sup>\*,b</sup>

<sup>a</sup> Department of Chemistry, Key Laboratory of Functional Molecular Engineering of Guangdong Province, South China University of Technology, Guangzhou 510641, China. E-mail: chhyliu@scut.edu.cn

<sup>b</sup> Department of Chemistry, E. Lansing, Michigan State University, MI 48824, USA. E-mail: changc@msu.edu

## Table of Content

|                                                                              |            |
|------------------------------------------------------------------------------|------------|
| <b>1. Optimization of the Reaction Conditions.....</b>                       | <b>S4</b>  |
| <b>2. Characterization of Intermediate.....</b>                              | <b>S9</b>  |
| <b>3. Mechanism Exploration.....</b>                                         | <b>S14</b> |
| <b>4. <sup>1</sup>H, <sup>13</sup>C and <sup>19</sup>F NMR Spectrum.....</b> | <b>S21</b> |

## 1. Optimization of Reaction Conditions

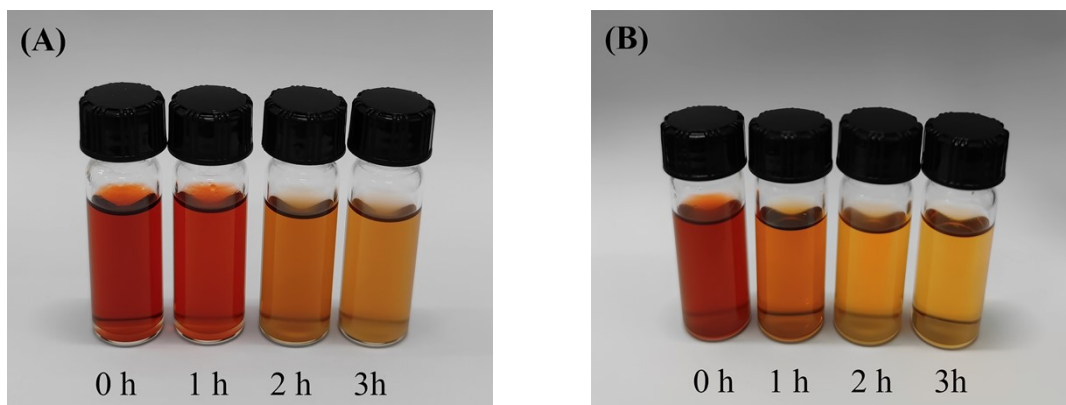

**Figure S1** The color reaction of sodium nitrite/ aniline  $\alpha$ -naphthol for monitoring sodium nitrite consuming in the catalytic reaction. (A) Open to the air, (B) Under the nitrogen atmosphere.

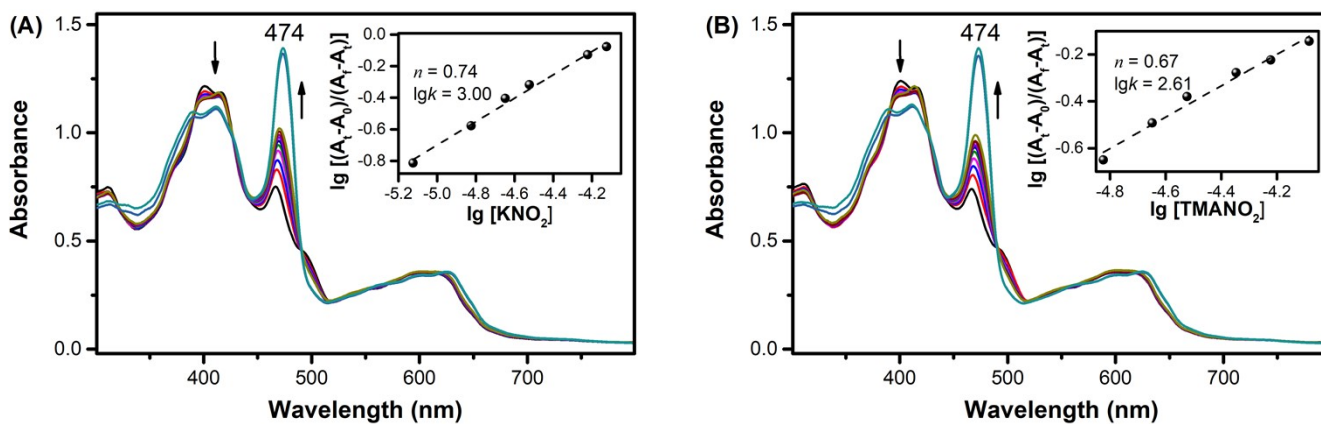

**Figure S2** UV-vis spectral changes of  $[(\text{F}_{15}\text{TPC}) \text{Mn}^{\text{III}}]$  upon the addition of  $\text{KNO}_2$  (A) and  $\text{TMANO}_2$  (B) in  $\text{CH}_3\text{CN}$  solution at  $25 \pm 0.1$  °C.

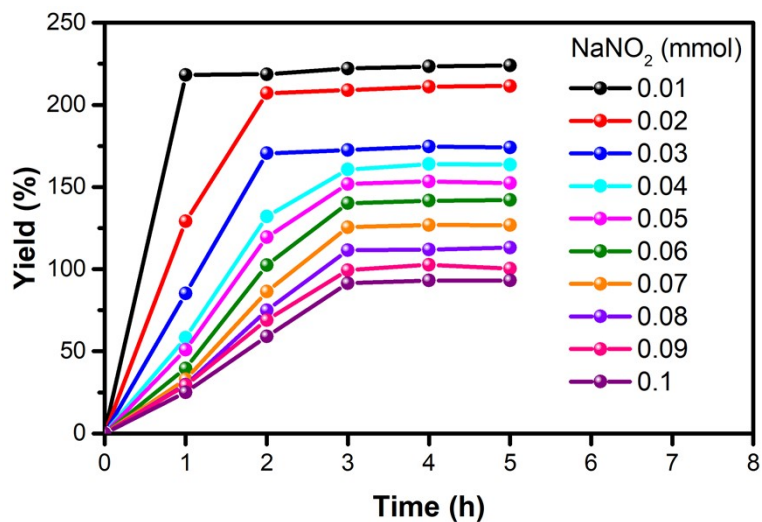

**Figure S3** Time courses of the yield of produced benzaldehyde for oxidation of styrene (1 mmol) by [(F<sub>15</sub>TPC)Mn<sup>III</sup>] (1 μmol) with different concentrations of aqueous solution of 5 M NaNO<sub>2</sub> (0.01-0.1 mmol) in 2 mL CH<sub>3</sub>CN at room temperature.

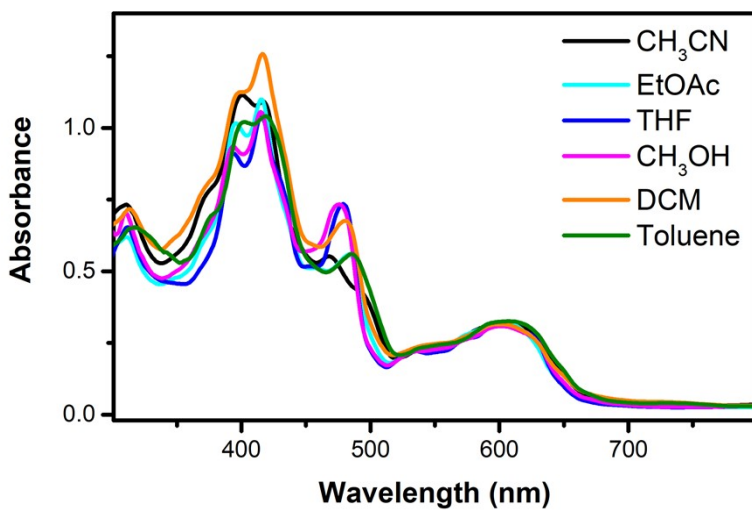

**Figure S4** UV-vis spectral of [(F<sub>15</sub>TPC)Mn<sup>III</sup>] in different solvents.

**Table S1** Effect of different catalysts and solvents on the selective oxidation of styrene.

| Entry <sup>a</sup> | Catalyst                                  | Solvent            | Yield (%) <sup>b</sup> |      |       | Total | TON  | Select(%)<br>BA |
|--------------------|-------------------------------------------|--------------------|------------------------|------|-------|-------|------|-----------------|
|                    |                                           |                    | BA                     | PA   | SO    |       |      |                 |
| 1                  | [(F <sub>15</sub> TPC)Mn <sup>III</sup> ] | EtOAc              | 55                     | N.D. | 0.4   | 55.4  | 27.7 | 99.3            |
| 2 <sup>c</sup>     | [(F <sub>15</sub> TPC)Mn <sup>III</sup> ] | Toluene            | 45.8                   | N.D. | 1.3   | 47.1  | 23.6 | 97.2            |
| 3                  | [(F <sub>15</sub> TPC)Mn <sup>III</sup> ] | CH <sub>3</sub> OH | N.D.                   | N.D. | N.D.  |       |      |                 |
| 4                  | [(F <sub>15</sub> TPC)Mn <sup>III</sup> ] | THF                | N.D.                   | N.D. | N.D.  |       |      |                 |
| 5                  | [(F <sub>15</sub> TPC)Mn <sup>III</sup> ] | DCM                | N.D.                   | N.D. | N.D.  |       |      |                 |
| 6                  | [(F <sub>10</sub> TPC)Mn <sup>III</sup> ] | CH <sub>3</sub> CN | 78.2                   | N.D. | Trace | 78.2  | 39.1 | > 99            |
| 7                  | [(F <sub>5</sub> TPC)Mn <sup>III</sup> ]  | CH <sub>3</sub> CN | 15.4                   | N.D. | Trace | 15.4  | 7.7  | > 99            |
| 8                  | [(F <sub>0</sub> TPC)Mn <sup>III</sup> ]  | CH <sub>3</sub> CN | 3.2                    | N.D. | Trace | 3.2   | 1.6  | > 99            |
| 9                  | [(F <sub>20</sub> TPP)Mn <sup>III</sup> ] | CH <sub>3</sub> CN | N.D.                   | N.D. | N.D.  |       |      |                 |
| 10                 | MnO <sub>2</sub>                          | CH <sub>3</sub> CN | N.D.                   | N.D. | N.D.  |       |      |                 |
| 11                 | K <sub>2</sub> MnO <sub>4</sub>           | CH <sub>3</sub> CN | N.D.                   | N.D. | N.D.  |       |      |                 |
| 12                 | KMnO <sub>4</sub>                         | CH <sub>3</sub> CN | N.D.                   | N.D. | N.D.  |       |      |                 |
| 13                 | Mn (OAc) <sub>2</sub>                     | CH <sub>3</sub> CN | N.D.                   | N.D. | N.D.  |       |      |                 |

<sup>a</sup> Reaction conditions: catalyst (1  $\mu$ mol), 0.05 mmol NaNO<sub>2</sub> (5 M aqueous solution, 10  $\mu$ L) and 1 mmol styrene were mixed in 2 mL CH<sub>3</sub>CN and stirred for 3 h at room temperature open to air. <sup>b</sup> Yields are determined by GC based on the amount of NaNO<sub>2</sub> used. <sup>c</sup> 12 h. N.D.= Not detected.

## 2. Characterization of Intermediate

### Intermediate $\text{Na}[(\text{F}_{15}\text{TPC})\text{Mn}^{\text{III}}(\text{NO}_2)]$ (**1**)

$\text{Na}[(\text{F}_{15}\text{TPC})\text{Mn}^{\text{III}}(\text{NO}_2)]$  (**1**) intermediate was generated by adding Sodium nitrite ( $\text{NaNO}_2$ , 2 equiv, 0.060 mM) into a UV-vis cuvette containing a  $\text{CH}_3\text{CN}$  solution of  $[(\text{F}_{15}\text{TPC})\text{Mn}^{\text{III}}]$  (0.030 mM) under air atmosphere at 25 °C. Formation of **1** with an absorption band at 474 nm. UV-vis ( $\text{CH}_3\text{CN}$ ):  $\lambda_{\text{max}}$  [nm] ( $\lg \varepsilon$ ) = 390 (4.42), 412 (4.44), 474 (3.53), 600 nm (3.89).

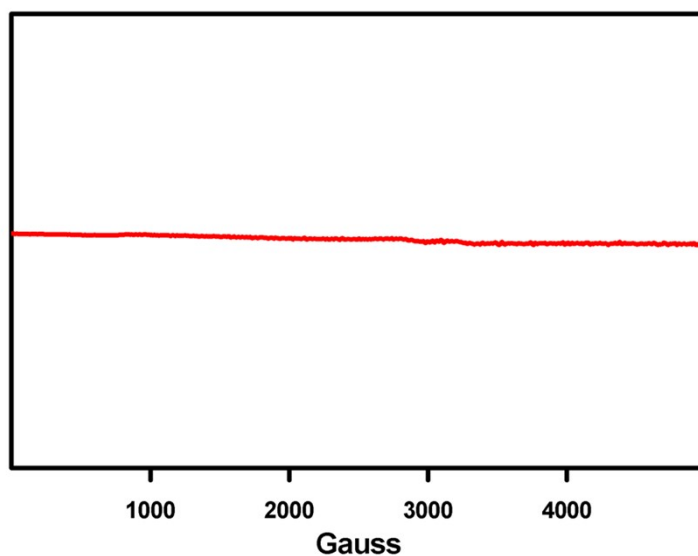

**Figure S5 1** was EPR X-band EPR spectrum of  $\text{Na}[(\text{F}_{15}\text{TPC})\text{Mn}^{\text{III}}(\text{NO}_2)]$ (**1**) produced by mixed  $[(\text{F}_{15}\text{TPC})\text{Mn}^{\text{III}}]$  (0.5 mmol) with  $\text{NaNO}_2$  (10 mmol) in 5 mL  $\text{CH}_3\text{CN}$ , confirm the formation of **1** by UV-vis, and then remove excess  $\text{NaNO}_2$ . Spectrum was recorded at 5 K.

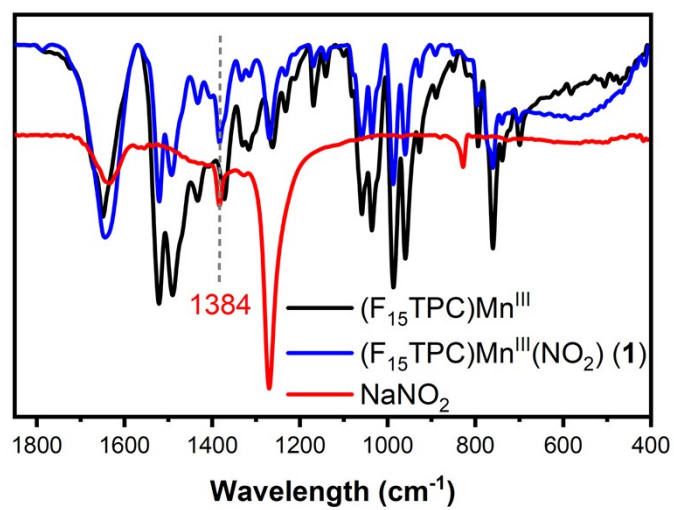

**Figure S6** FT-IR of [(F<sub>15</sub>TPC)Mn<sup>III</sup>], [(F<sub>15</sub>TPC)Mn<sup>III</sup>(NO<sub>2</sub>)] (1) and NaNO<sub>2</sub>.

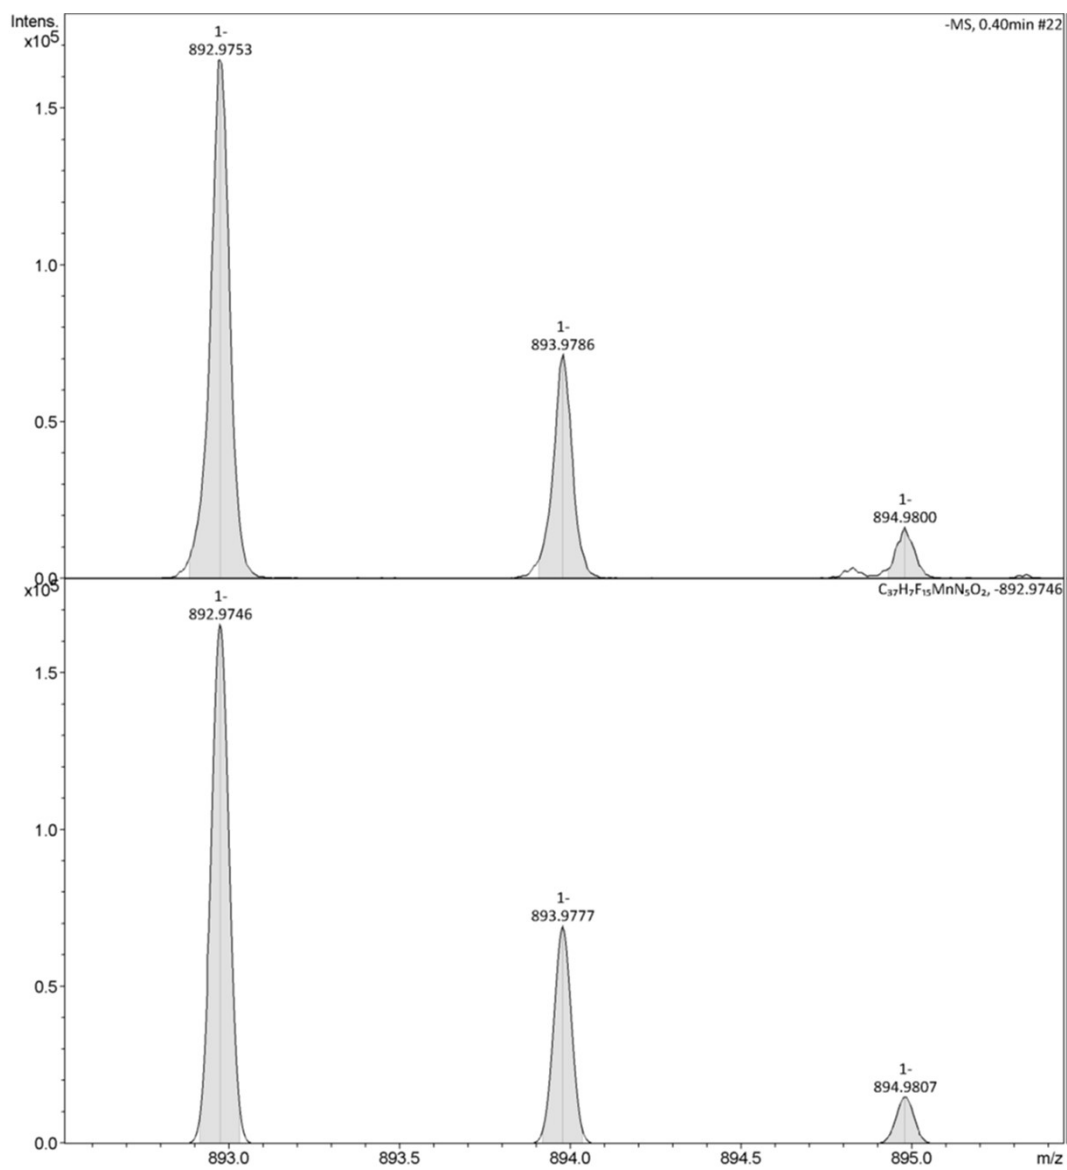

**Figure S7** HRMS spectrum of [(F<sub>15</sub>TPC)Mn<sup>III</sup>(NO<sub>2</sub>)] in mixed CH<sub>3</sub>CN solution of [(F<sub>15</sub>TPC)Mn<sup>III</sup>](30 μM) with NaNO<sub>2</sub> (2 eq).

### Intermediate [(F<sub>15</sub>TPC)Mn<sup>V</sup>(O)] (**2**)

[(F<sub>15</sub>TPC)Mn<sup>V</sup>(O)] (**2**) was produced by adding NaNO<sub>2</sub> (2 equiv, 0.060 mM) and a small amount of styrene into a CH<sub>3</sub>CN solution of [(F<sub>15</sub>TPC)Mn<sup>III</sup>] (0.030 mM) under air at 25 °C. Formation of **2** was confirmed by monitoring UV-vis spectral changes at 472 and 600 nm due to the decay of [(F<sub>15</sub>TPC)Mn<sup>III</sup>] and at 346 and 406 nm due to the formation of **2**. UV-vis (CH<sub>3</sub>CN): λ<sub>max</sub> [nm] (lg ε) = 346 (4.53), 406 (4.54), 520 (3.92). HRMS(ESI):m/z calcd for C<sub>37</sub>H<sub>8</sub>F<sub>15</sub>N<sub>4</sub>MnO+H<sup>+</sup>: 864.9912 [M+H]<sup>+</sup>; found: 864.9903.

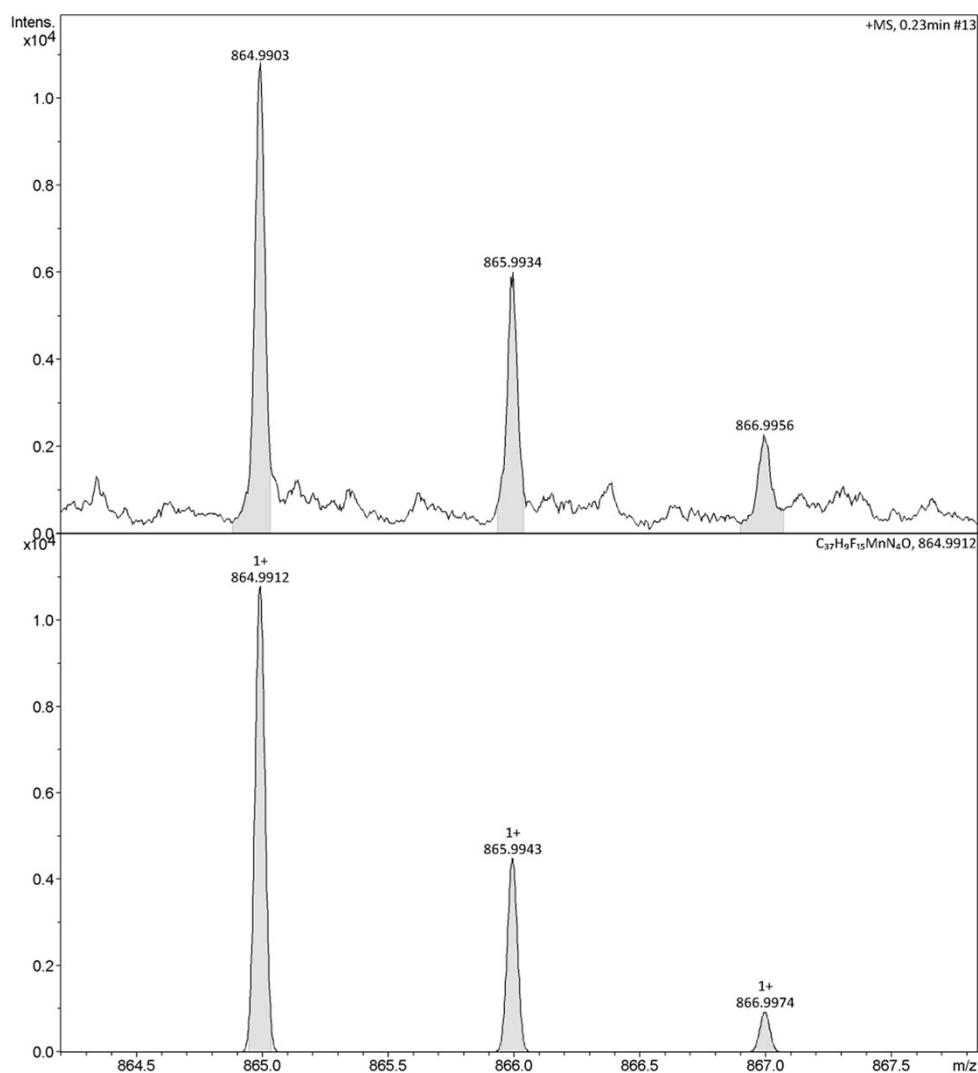

**Figure S8** Situ HRMS spectrum of [(F<sub>15</sub>TPC)Mn<sup>V</sup>(O)] species in the reaction mixture.



# Intermediate [(F<sub>15</sub>TPC)Mn<sup>V</sup>(O<sub>2</sub>)]

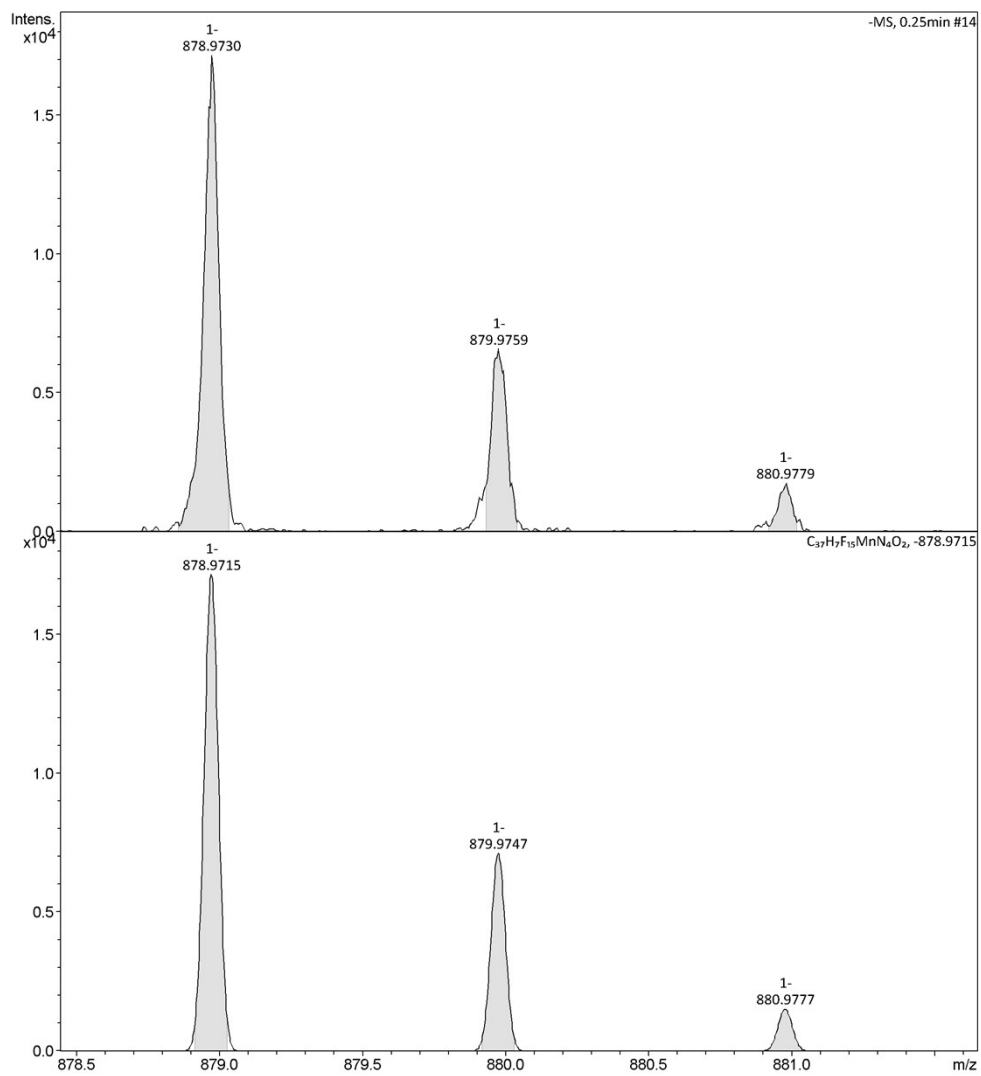

**Figure S9** Situ HRMS spectrum of [(F<sub>15</sub>TPC)Mn<sup>V</sup>(O<sub>2</sub>)] species in the reaction mixture.

### 3. Mechanism Exploration

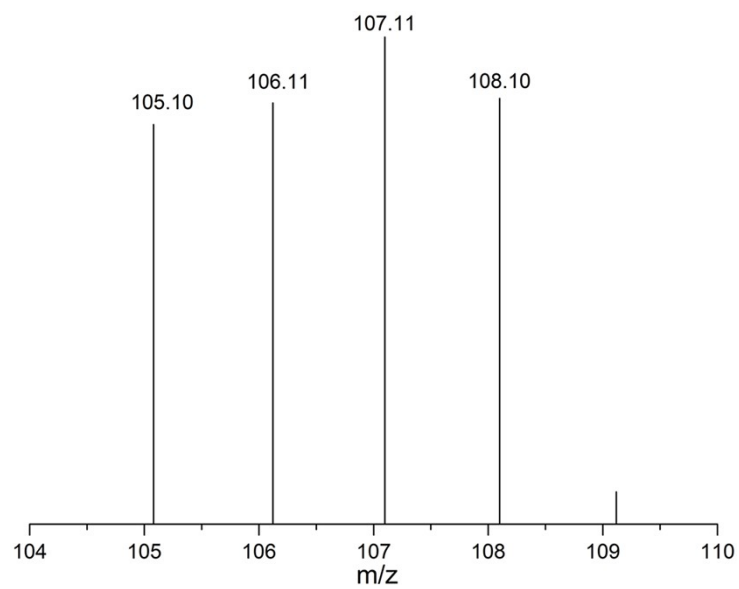

**Figure S10** GC-MS spectrum of product of catalytic reaction of styrene with  $[(F_{15}TPC)Mn^{III}]$  using  $NaNO_2$  as oxidant in the presence of  $H_2^{18}O$ .

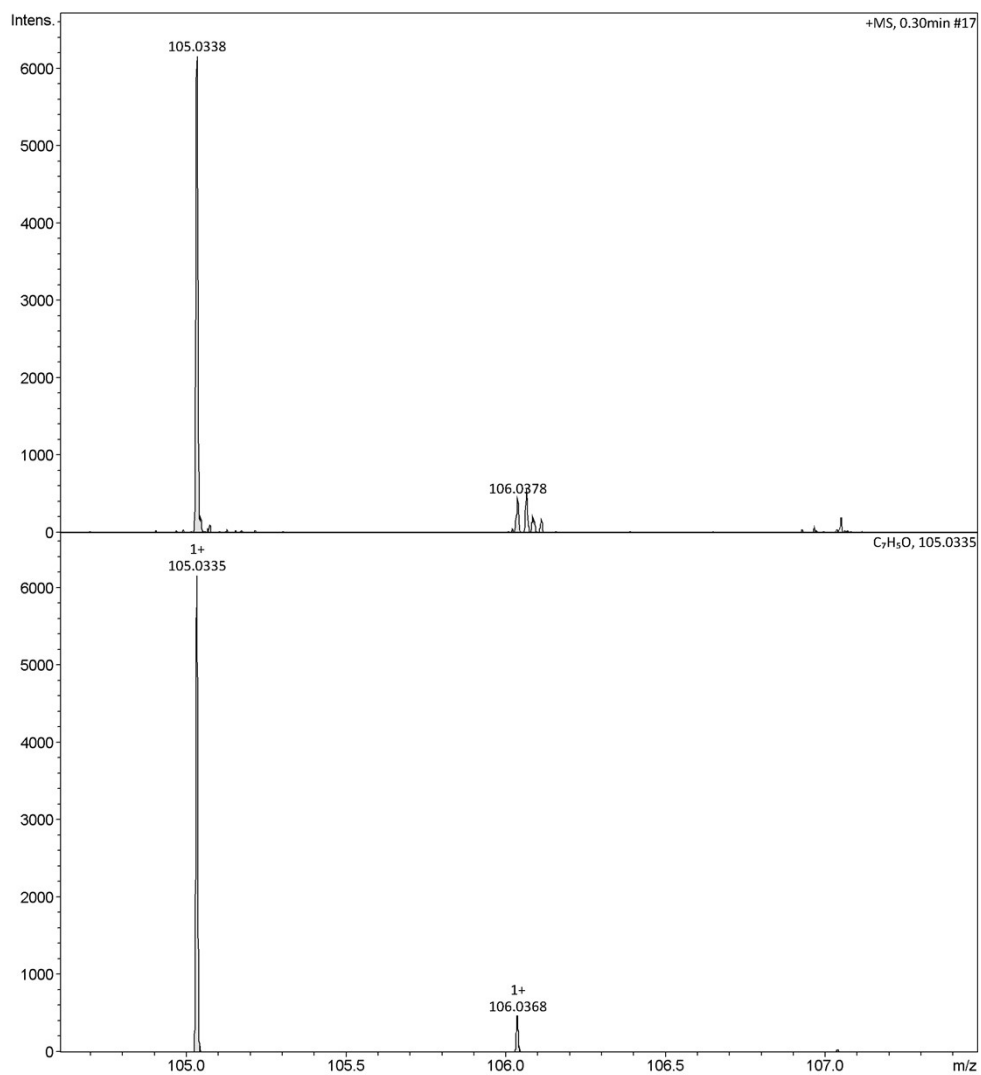

**Figure S11** HRMS spectrum of benzaldehyde: CH<sub>3</sub>CN (2 mL) solution containing 100  $\mu$ L H<sub>2</sub><sup>18</sup>O, benzaldehyde (400  $\mu$ mol) and [(F<sub>15</sub>TPC)Mn<sup>III</sup>] (1  $\mu$ mol).

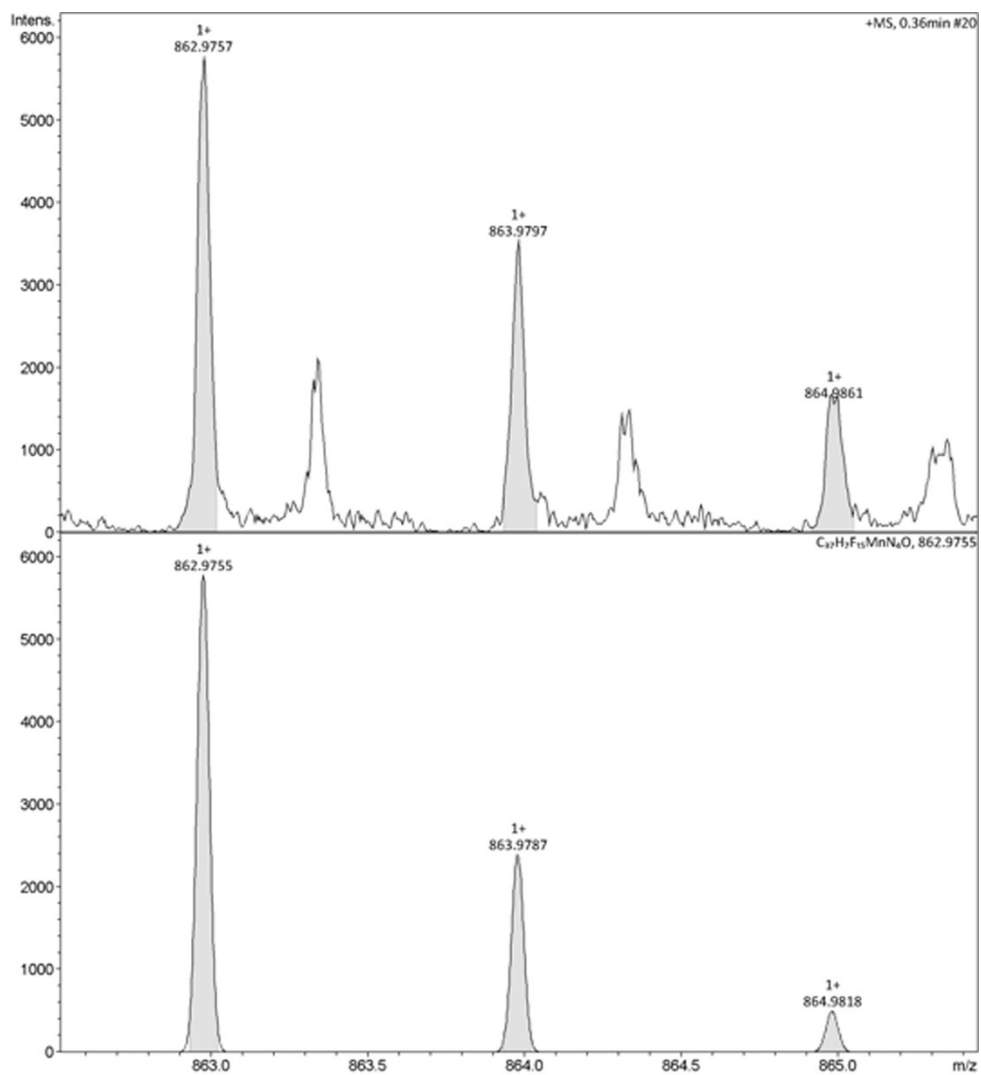

**Figure S12** Situ HRMS spectrum of  $[(F_{15}TPC)Mn^V(O)]$  (**2**) after added 50  $\mu$ L  $H_2^{18}O$  in  $CH_3CN$ .

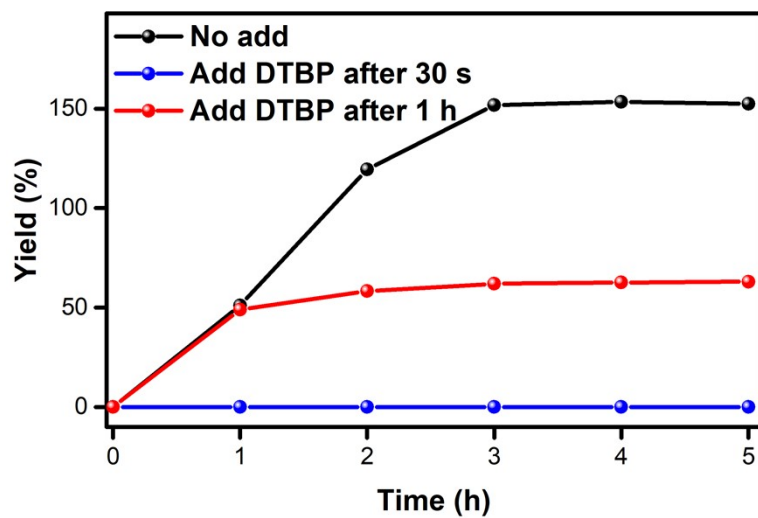

**Figure S13** The product yields changes with time, DTBP was added after the manganese corrole catalyzed reaction proceeded for 30 s and 1 h. Reaction conditions: catalyst (1  $\mu\text{mol}$ ), 0.05 mmol nitrite (5 M aqueous solution, 10  $\mu\text{L}$ ) and 1 mmol styrene were mixed in 2 mL  $\text{CH}_3\text{CN}$  and stirred at room temperature open to air.

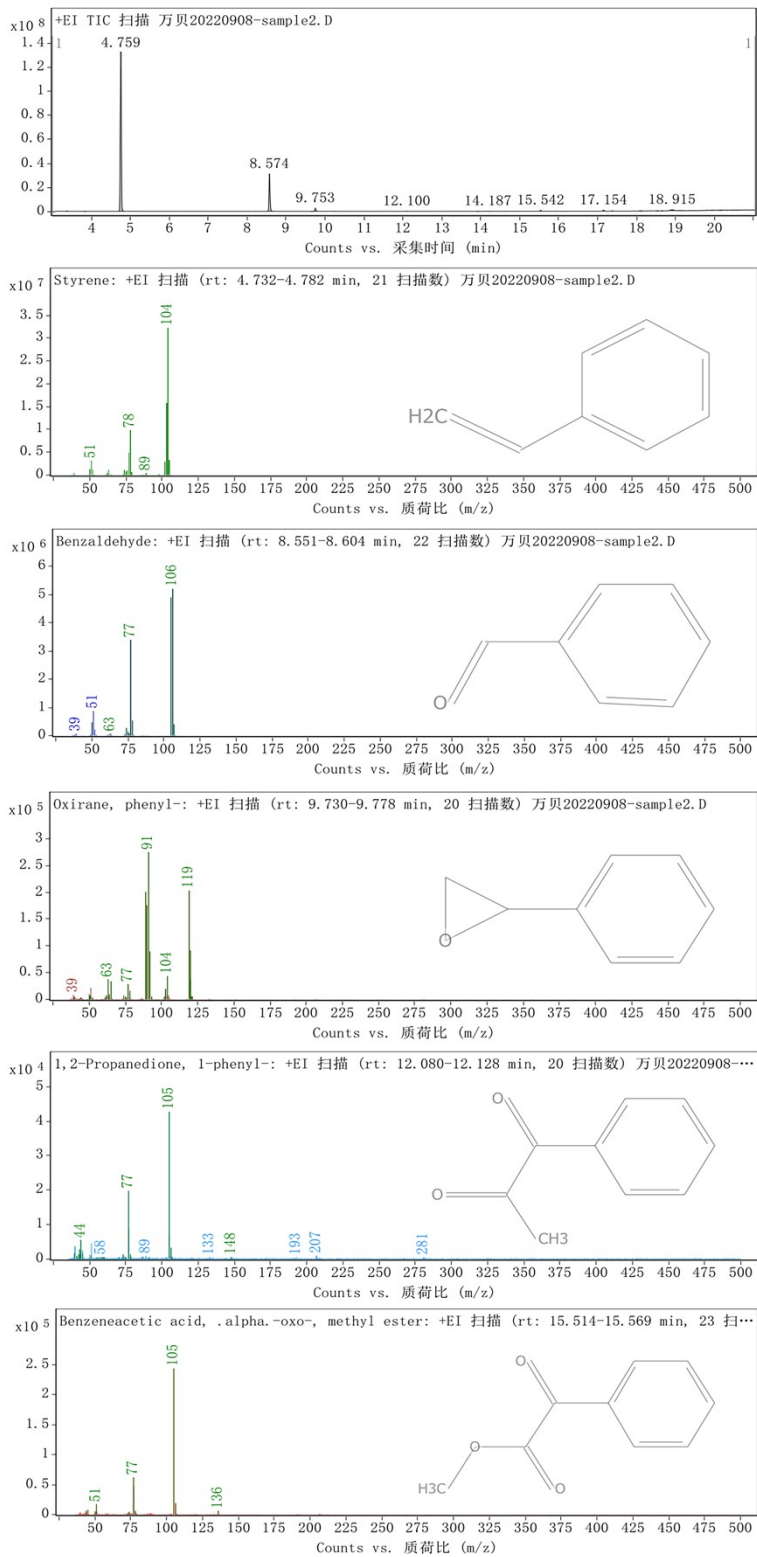

**Figure S14** GC-MS results of reaction mixture progressed 2 hours.

## 4. $^1\text{H}$ , $^{13}\text{C}$ and $^{19}\text{F}$ NMR Spectrum

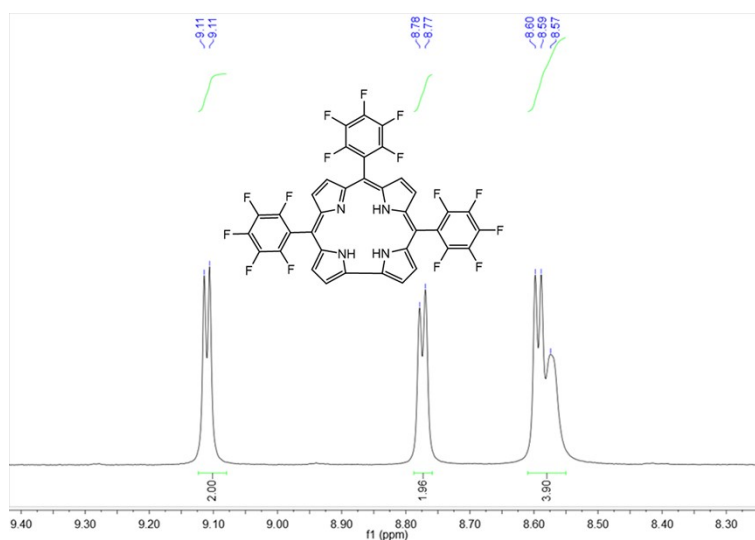

$^1\text{H}$  NMR spectrum of [F<sub>15</sub>TPC] (500 MHz, CDCl<sub>3</sub>)

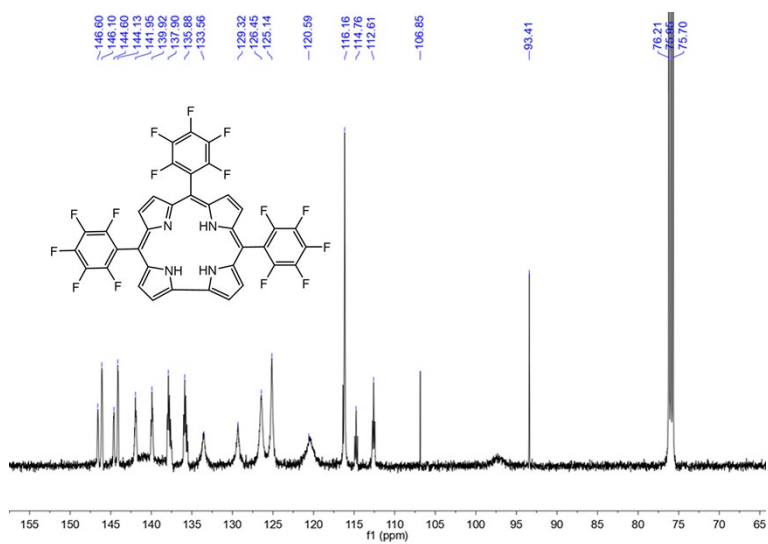

$^{13}\text{C}$  NMR spectrum of [F<sub>15</sub>TPC] (126 MHz, CDCl<sub>3</sub>)

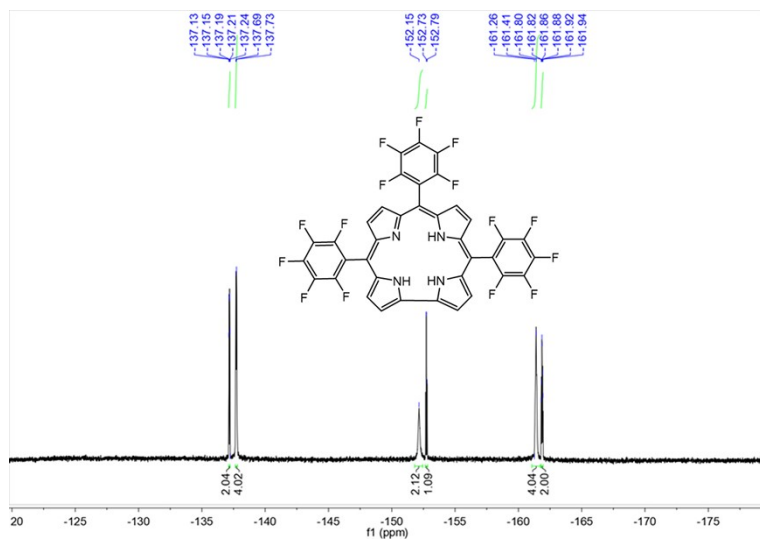

<sup>19</sup>F NMR spectrum of [F<sub>15</sub>TPC] (376 MHz, CDCl<sub>3</sub>)

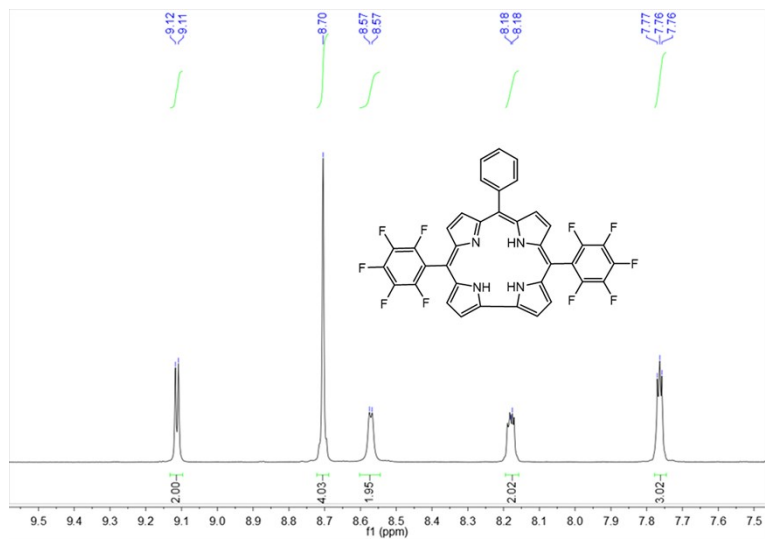

<sup>1</sup>H NMR spectrum of [F<sub>10</sub>TPC] (500 MHz, CDCl<sub>3</sub>)



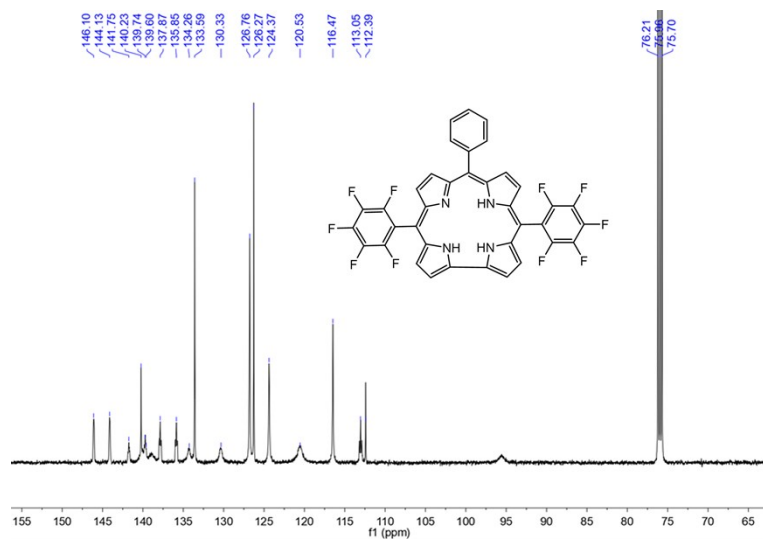

<sup>13</sup>C NMR spectrum of [F<sub>10</sub>TPC] (126 MHz, CDCl<sub>3</sub>)

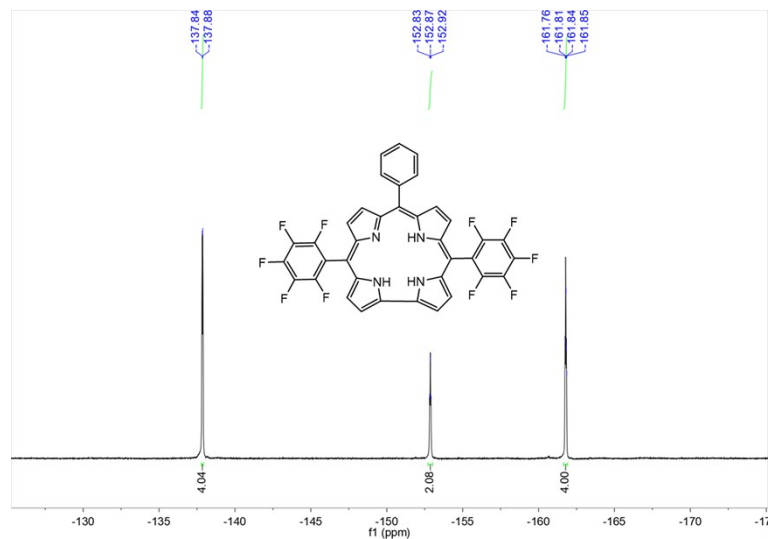

<sup>19</sup>F NMR spectrum of [F<sub>10</sub>TPC] (471 MHz, CDCl<sub>3</sub>)

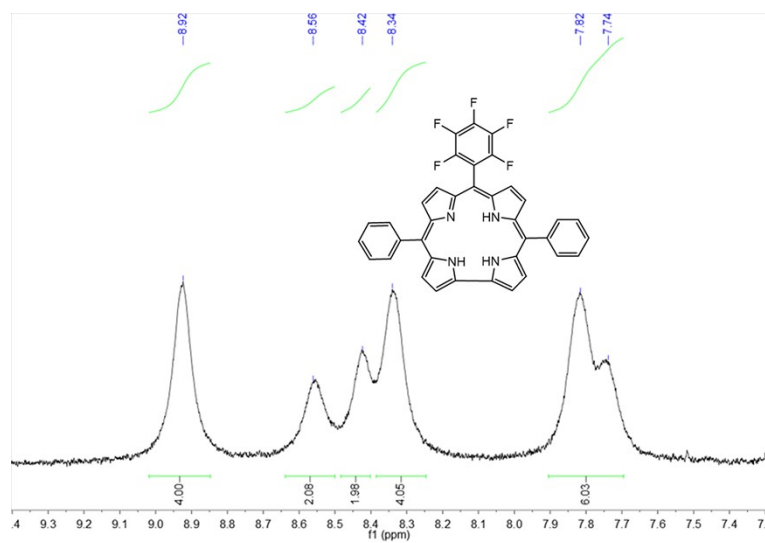

<sup>1</sup>H NMR spectrum of [F<sub>5</sub>TPC] (400 MHz, CDCl<sub>3</sub>)

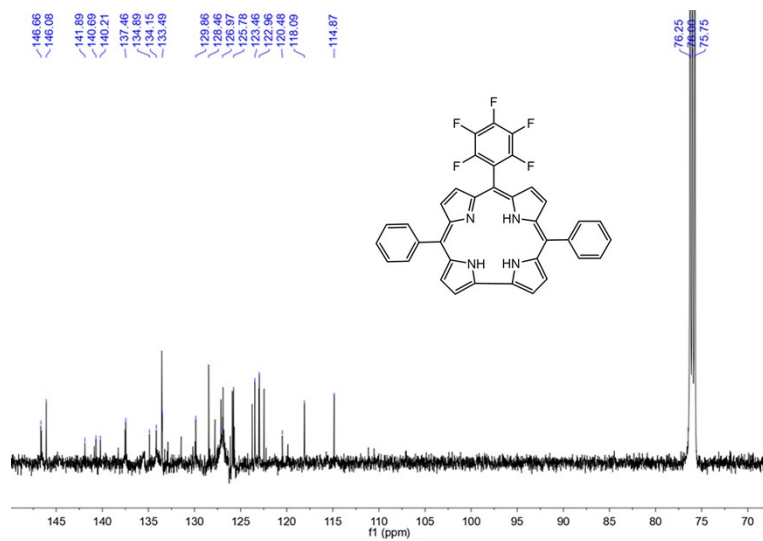

<sup>13</sup>C NMR spectrum of [F<sub>5</sub>TPC] (126 MHz, CDCl<sub>3</sub>)

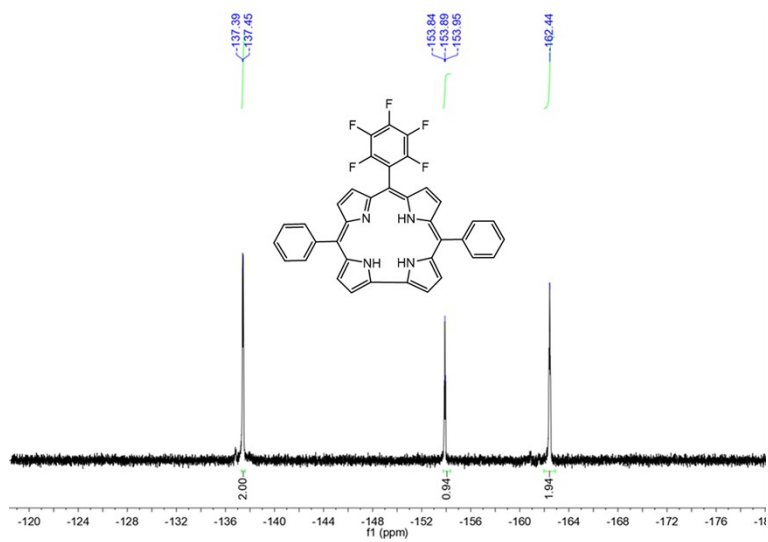

<sup>19</sup>F NMR spectrum of [F<sub>5</sub>TPC] (376 MHz, CDCl<sub>3</sub>)

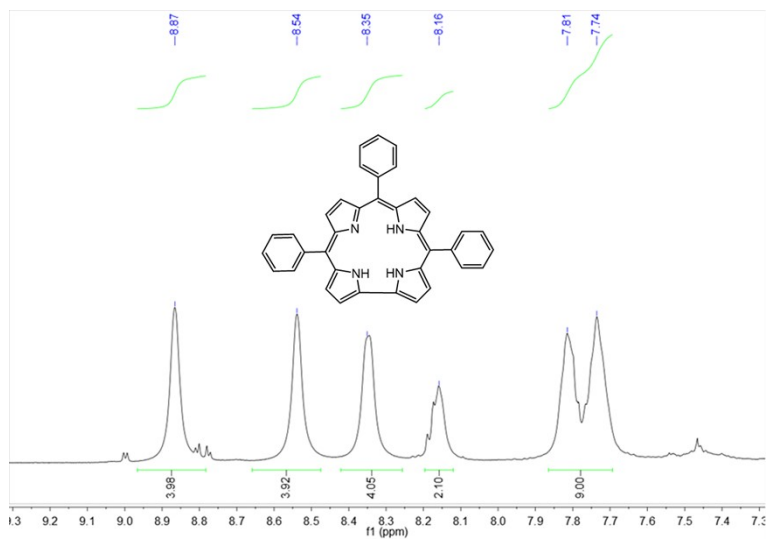

<sup>1</sup>H NMR spectrum of [F<sub>0</sub>TPC] (500 MHz, CDCl<sub>3</sub>)

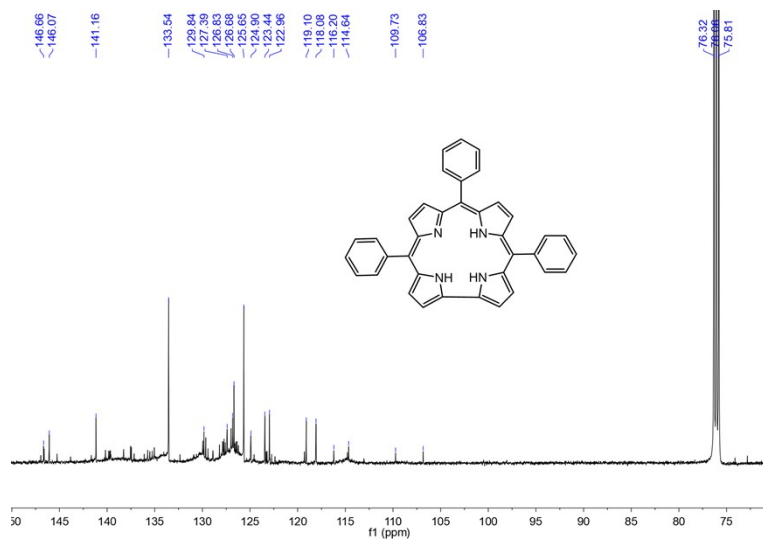

<sup>13</sup>C NMR spectrum of [F<sub>0</sub>TPC] (126 MHz, CDCl<sub>3</sub>)

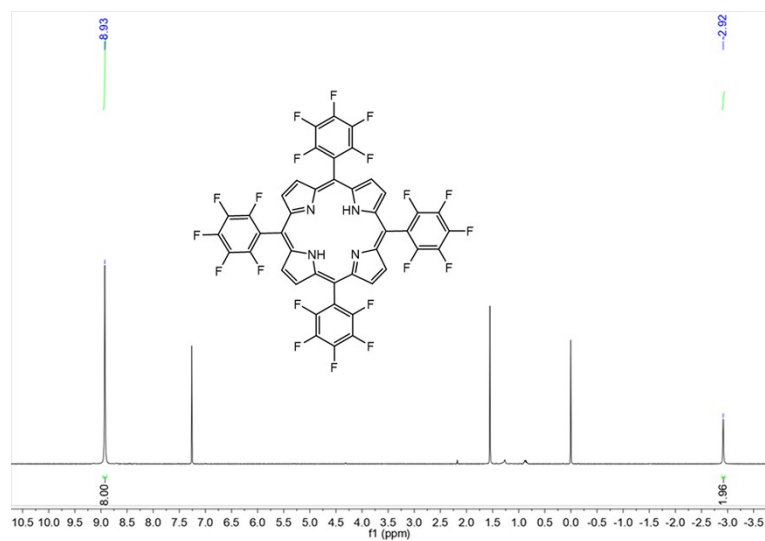

<sup>1</sup>H NMR spectrum of [F<sub>20</sub>TPP] (400 MHz, CDCl<sub>3</sub>)

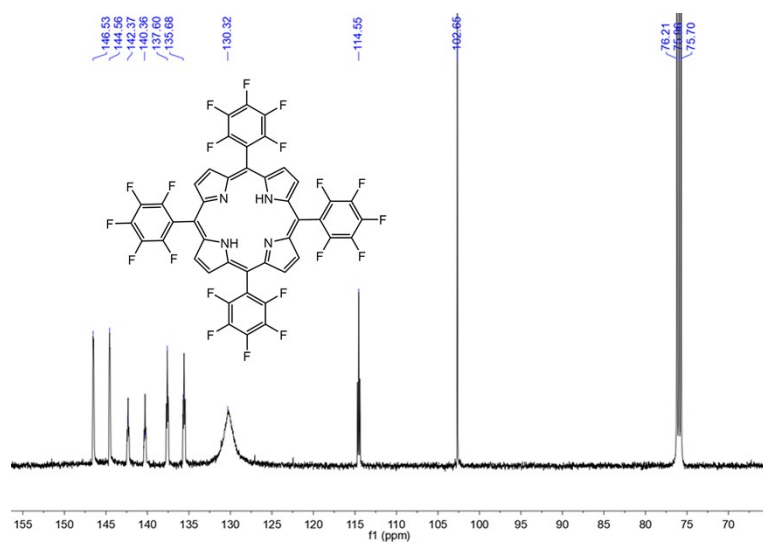

<sup>13</sup>C NMR spectrum of [F<sub>20</sub>TPP] (126 MHz, CDCl<sub>3</sub>)

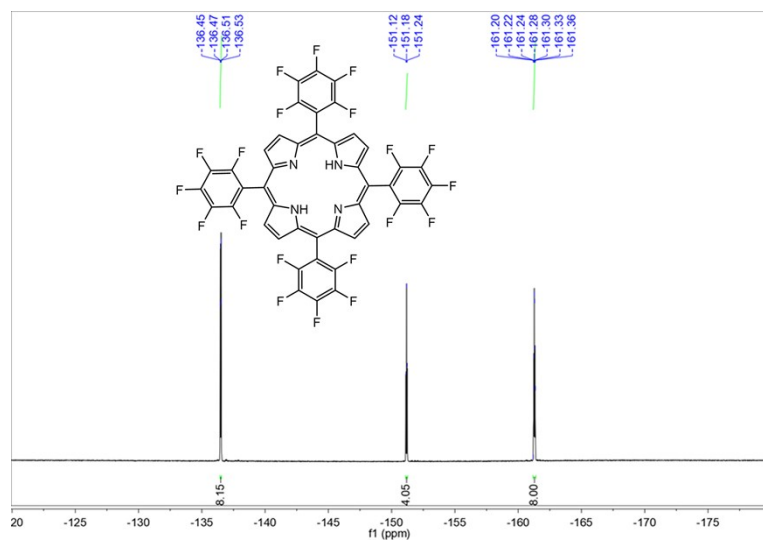

<sup>19</sup>F NMR spectrum of [F<sub>20</sub>TPP] (376 MHz, CDCl<sub>3</sub>)
